# Supplementary material
Source: HighWire-hosted journal article supplement (http://jpet.aspetjournals.org/highwire/filestream/136385/field_highwire_adjunct_files/0/JPET197483_data_supplement.pdf)
Supplement: JPET197483_data_supplement.pdf [file JPET197483_data_supplement.pdf]

**Supplementary Data:**

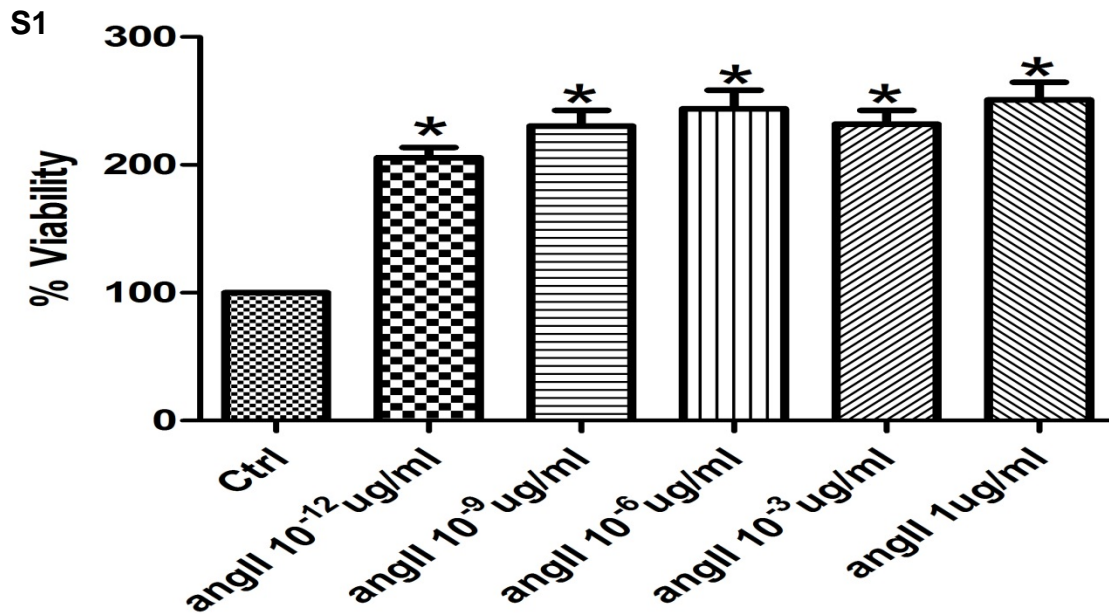

**S1: Angiotensin II increases the viability of human cerebrovascular endothelial cells (hCMECs).** hCMECs were cultured and treated with different doses of AngII and their viability was assessed using MTT metabolism. AngII significantly increased the viability of hCMECs in all doses. \* significantly different from ctrl; overall p=0.0001, F=18.36.

Ahmed Alhusban, Anna Kozak, Adviye Ergul, Susan C Fagan.  
AT1 receptor antagonism is proangiogenic in the brain: BDNF a novel mediator  
Journal of pharmacology and experimental therapeutics

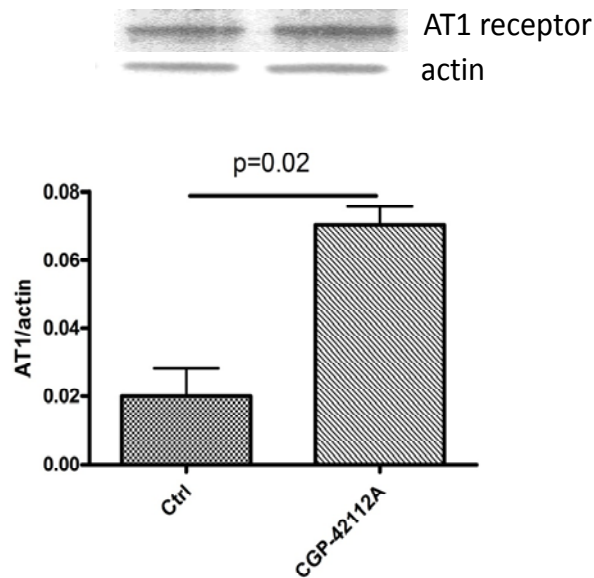

**S2: AT1 expression is induced through AT2 stimulation. hCMECs were serum starved for 16 hours followed by treatment with either the AT2 agonist CGP-42112A (0.1 $\mu$ M) or vehicle and the expression of AT1 was quantified. Data presented as mean $\pm$ SEM, n=3.**

Ahmed Alhusban, Anna Kozak, Adviye Ergul, Susan C Fagan.  
AT1 receptor antagonism is proangiogenic in the brain: BDNF a novel mediator  
Journal of pharmacology and experimental therapeutics

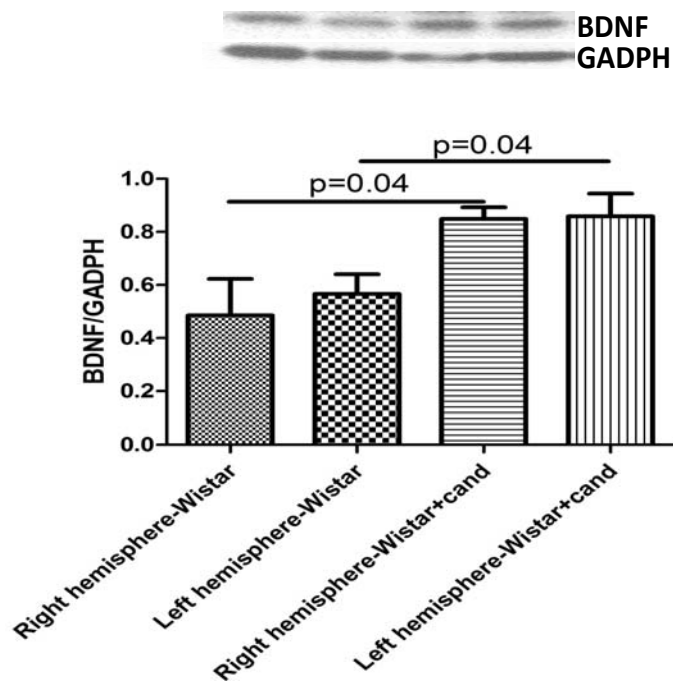

**S3: AT1 blockade affects the expression of BDNF in wistar rats. Wistar rats were subjected to sham surgery and randomized to receive either saline or candesartan (1mg/kg) 3 hours after surgery. Candesartan significantly increased BDNF expression in both hemispheres as compared to the corresponding hemispheres in saline treated animals. p=0.04; n=4 per group.**

Ahmed Alhusban, Anna Kozak, Adviye Ergul, Susan C Fagan.  
AT1 receptor antagonism is proangiogenic in the brain: BDNF a novel mediator  
Journal of pharmacology and experimental therapeutics

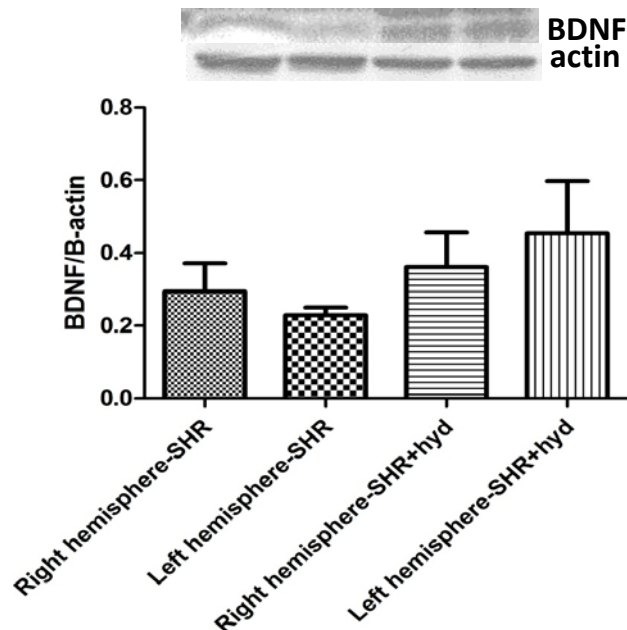

**S4: Blood pressure reduction with hydralazine did not affect BDNF expression. Spontaneously hypertensive rats were exposed to sham surgery and randomized to receive either saline or hydralazine (1mg/kg) 3 hours after surgery. Hydralazine treatment resulted in a trend toward increased BDNF expression in the brain; but this trend did not reach statistical significance level. n=4 per group.**
